combination of N-methyl-D-aspartate and gamma-aminobutyric acid type A receptor anesthetic agents potentiates apoptotic neurodegeneration and persistent behavioral deficits. *ANESTHESIOLOGY* 2007; 107:427-36

7. McGowan FX Jr, Davis PJ: Anesthetic-related neurotoxicity in the developing infant: Of mice, rats, monkeys and, possibly, humans. *Anesth Analg* 2008; 106:1599-602

8. Anand KJ, Soriano SG: Anesthetic agents and the immature brain: Are these toxic or therapeutic? *ANESTHESIOLOGY* 2004; 101:527-30

9. Slikker W Jr, Paule MG, Wright LK, Patterson TA, Wang C: Systems biology approaches for toxicology. *J Appl Toxicol* 2007; 27:201-17

10. Culley DJ, Crosby G, Xie Z, Vacanti CA, Kitz RJ, Zapol WM: Career National Institutes of Health funding and scholarship of chairpersons of academic departments of anesthesiology and surgery. *ANESTHESIOLOGY* 2007; 106:836-42

11. Loepke AW, Soriano SG: An assessment of the effects of general anesthetics on developing brain structure and neurocognitive function. *Anesth Analg* 2008; 106:1681-707

12. Dobbing J, Sands J: Comparative aspects of the brain growth spurt. *Early Hum Dev* 1979; 3:79-83

13. Loepke AW, McGowan FX Jr, Soriano SG: CON: The toxic effects of anesthetics in the developing brain: the clinical perspective. *Anesth Analg* 2008; 106:1664-9

14. Achenbach TM: Manual for the Child Behavior Checklist/4-18 and 1991 profiles. Burlington, VT, University of Vermont, Department of Psychiatry, 1991

15. Verhulst FC, Van der Ende J, Koot HM: Manual for the CBCL/4-18 (in Dutch). Rotterdam, Sophia Child Hospital / Academic Hospital Rotterdam, Department of Child Psychiatry, 1996

16. Donders AR, van der Heijden GJ, Stijnen T, Moons KG: Review: A gentle introduction to imputation of missing values. *J Clin Epidemiol* 2006; 59:1087-91

17. Greenland S, Finkle WD: A critical look at methods for handling missing covariates in epidemiologic regression analyses. *Am J Epidemiol* 1995; 142:1255-64

18. Anand KJ: Consensus statement for the prevention and management of pain in the newborn. *Arch Pediatr Adolesc Med* 2001; 155:173-80

19. Rasmussen LS, Johnson T, Kuipers HM, Kristensen D, Siersma VD, Vila P, Jolles J, Papaioannou A, Abildstrom H, Silverstein JH, Bonal JA, Raeder J, Nielsen IK, Korttila K, Munoz L, Dodds C, Hanning CD, Moller JT: Does anaesthesia cause postoperative cognitive dysfunction? A randomised study of regional *versus* general anaesthesia in 438 elderly patients. *Acta Anaesthesiol Scand* 2003; 47:260-6

20. Hermanns H, Stevens MF, Werdehausen R, Braun S, Lipfert P, Jetzek-Zader M: Sedation during spinal anesthesia in infants. *Br J Anaesthesia* 2006; 97:380-4

21. Somri M, Tome R, Yanovski B, Asfandiarov E, Carmi N, Mogilner J, David B, Gaitini LA: Combined spinal-epidural anesthesia in major abdominal surgery in high-risk neonates and infants. *Paediatr Anaesth* 2007; 17:1059-65

22. Vandembroucke JP: The history of confounding. *Soz Praventivmed* 2002; 47:216-24

23. Hill AB: The Environment and disease: Association or causation? *Proc R Soc Med* 1965; 58:295-300

24. Rothman KJ: *Epidemiology: An Introduction*. New York, Oxford University Press, 2002

## ■ ANESTHESIOLOGY REFLECTIONS

### Emerson Respirator or “Iron Lung”

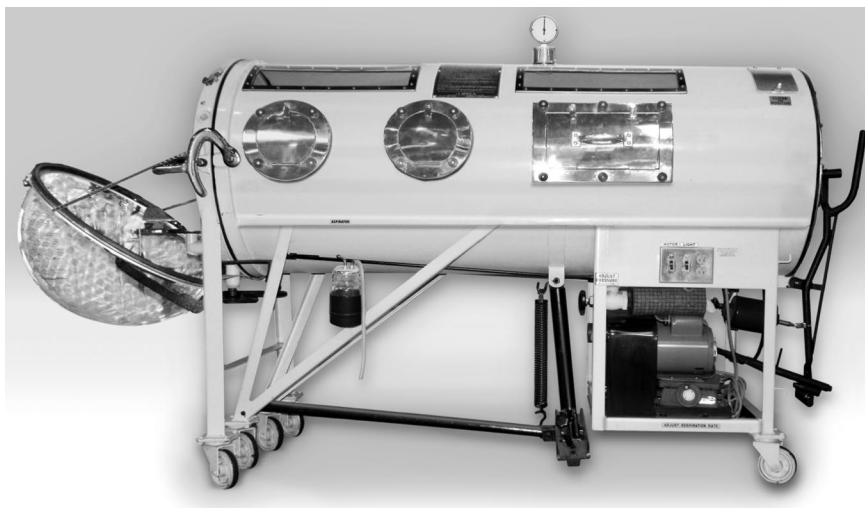

A descendant of Ralph Waldo Emerson, John Haven “Jack” Emerson (1906–1997) demonstrated his mechanical genius by inventing in 1931 the first efficient, economical “iron lung,” which he called his “Respirator.” When Harvard University sued him for patent infringement, Emerson invalidated Harvard’s patents by proving others had prior claims on the tank respirator. “Not bad,” Jack noted drily, “for a high school dropout.” Unlike his prevailing sense of humor, Emerson’s eyes were rarely dry around photographs from the 1950s of school gymnasiums filled with tank-bound polio-stricken children. Many of these youngsters would eventually recover from their suffocating paralysis, courtesy of their tiny versions of his Emerson Respirator. (Copyright © the American Society of Anesthesiologists, Inc. This image appears in the *Anesthesiology Reflections* online collection available at [www.anesthesiology.org](http://www.anesthesiology.org).)

George S. Bause, M.D., M.P.H., Honorary Curator, ASA’s Wood Library-Museum of Anesthesiology, Park Ridge, Illinois, and Clinical Associate Professor, Case Western Reserve University, Cleveland, Ohio. [UJYC@aol.com](mailto:UJYC@aol.com).
